# Supplementary material
Source: MDPI journal article supplement (https://www.mdpi.com/2071-1050/13/20/11167)
Supplement: s1 [file s1]

# Supplementary Materials: Life-Cycle Assessment of Fly Ash and Cenosphere-based Geopolymer Material

Wei Xin Tang, Gloria Pignatta, and Samad M.E. Sepasgozar

## Online Resource

Figure S1 plots the volume-based particle size distribution for the three industrial by-product materials used to produce the two geopolymers FA-G and C-G. The particle size of cenospheres is the highest due to their hollow microstructure and shows a bimodal distribution while fly ash and GGBFS present a unique peak at higher and smaller particle sizes, respectively. As clearly shown in the figure, the decrease in density results from C-G naturally having, on average, a coarser particle size than FA-G.

Figure S2 shows the Scanning Electron Microscopy (SEM) images of the hollow microstructure of cenospheres.

Table S1 shows the inventories for energy/fuel.

Table S2 shows the inventories for transport.

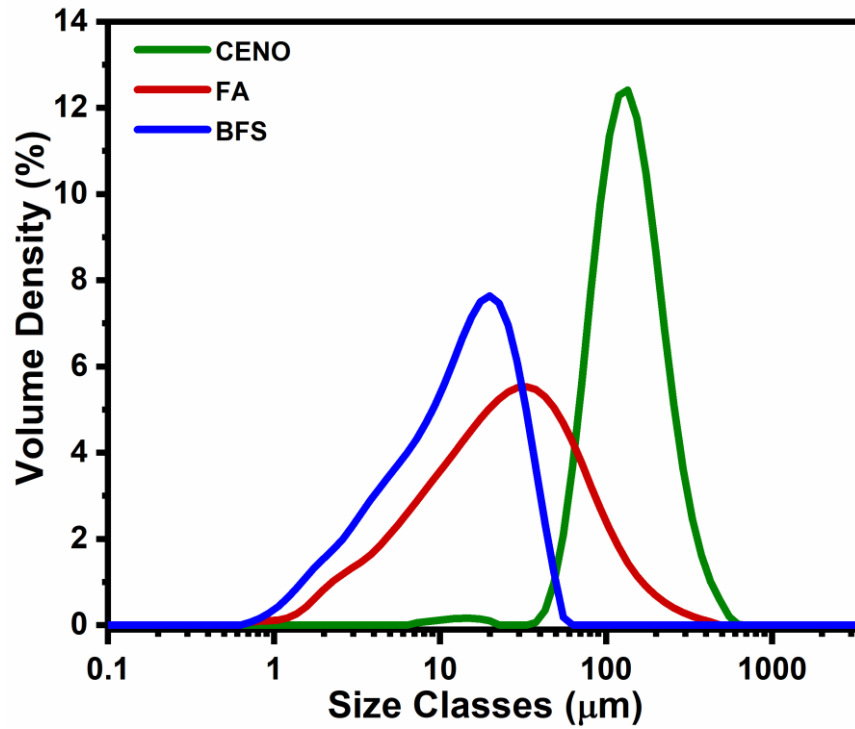

**Figure S1.** Volume density against particle size distribution of the industrial by-product materials (cenospheres in green, fly ash in red, and GGBFS in blue).

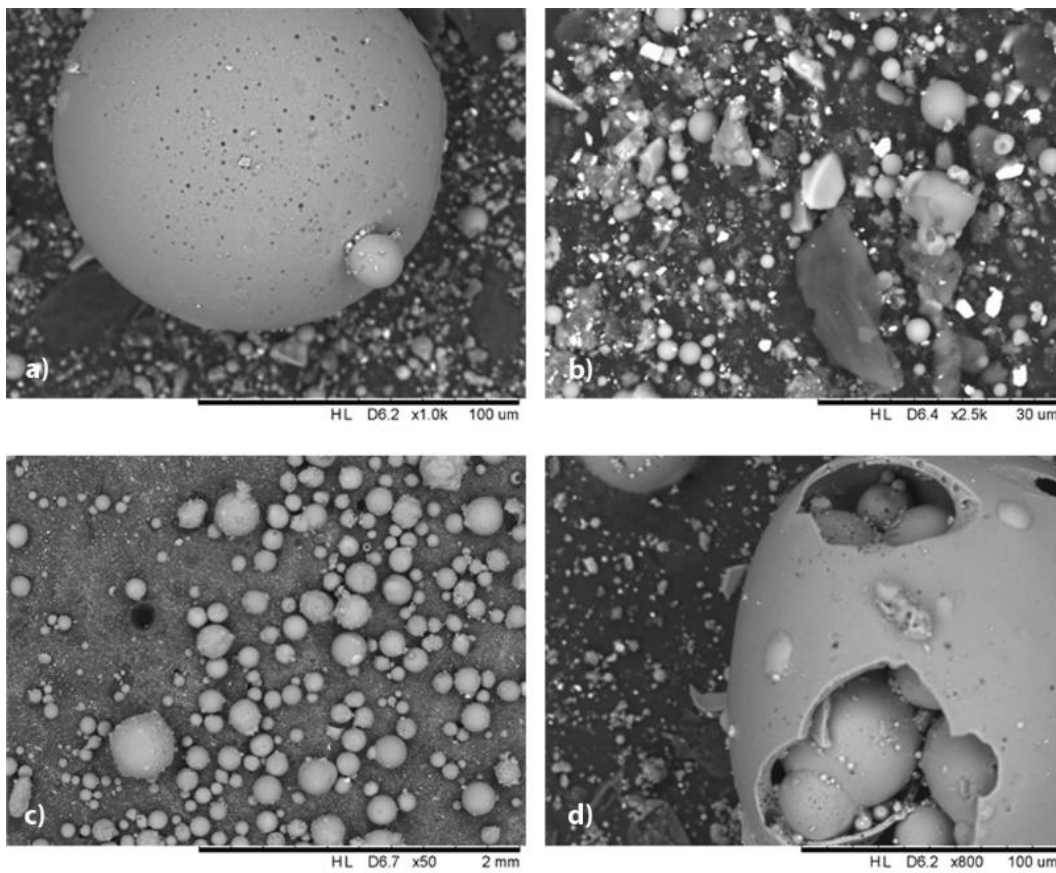

**Figure S2.** Scanning electron microscopy (SEM) images of the pure hollow cenospheres used in this study: a) x1.0k, b) x2.5k, c) x50, and d) x800.

**Table S1.** Inventories for energy/fuel.

| <b>Ecoinvent 3.7.1 databases</b> |                                                                                                                    |
|----------------------------------|--------------------------------------------------------------------------------------------------------------------|
| Electricity                      | Electricity, medium voltage (AU)                                                                                   |
| Diesel                           | Diesel burned in building machine (GLO)                                                                            |
| Natural gas                      | Natural gas, from high-pressure network (1-5 bar), at service station (RoW)                                        |
| Fuel oil                         | Light fuel oil (RoW)                                                                                               |
| Coal                             | Heat, district or industrial, other than natural gas (RoW) heat production, at coal coke industrial furnace 1-10MW |

**Table S2.** Inventories for transport.

| <b>Ecoinvent 3.7.1 databases</b> |                                                         |
|----------------------------------|---------------------------------------------------------|
| Truck                            | Transport, freight, lorry 16-32 metric ton, Euro5 (RoW) |
| Ship                             | Transport, freight, sea, ferry (GLO)                    |
| Train                            | Transport, freight train (RoW)                          |
